# Supplementary material for: Efficient synthesis of C15fuel precursor by heterogeneously catalyzed aldol-condensation of furfural with cyclopentanone
Source: Royal Society of Chemistry journal article supplement (doi:10.1039/c8ra09517e), 2019-01-01
Supplement: c8ra09517e1.pdf [file c8ra09517e1.pdf]

## Electronic Supplementary Information

### Efficient synthesis of C<sub>15</sub> fuel precursor by heterogeneously catalyzed aldol-condensation of furfural with cyclopentanone

Lei Ao, Wei Zhao\*, Yin-shuang Guan, Ding-kai Wang, Kai-shuai Liu, Tian-tian Guo,  
Xing Fan, Xian-yong Wei

*Key Laboratory of Coal Processing and Efficient Utilization, China University of Mining & Technology, Xuzhou 221116, Jiangsu, People's Republic of China.*

#### Table of Contents

1. H<sup>1</sup> NMR spectrum of the solid product obtained over 33wt % KF/ $\gamma$ -Al<sub>2</sub>O<sub>3</sub>.....S2
2. HPLC chromatogram of the solid product obtained over 33wt % KF/ $\gamma$ -Al<sub>2</sub>O<sub>3</sub>.....S3
3. XRD patterns of different KF loading KF/ $\gamma$ -Al<sub>2</sub>O<sub>3</sub>.....S4
4. Comparison of the CO<sub>2</sub>-TPD curves of the fresh and reused catalysts.....S5

---

\* Corresponding author. Tel.: + 86 13905200134.  
E-mail address: [zhaow1965@163.com](mailto:zhaow1965@163.com) (W. Zhao).

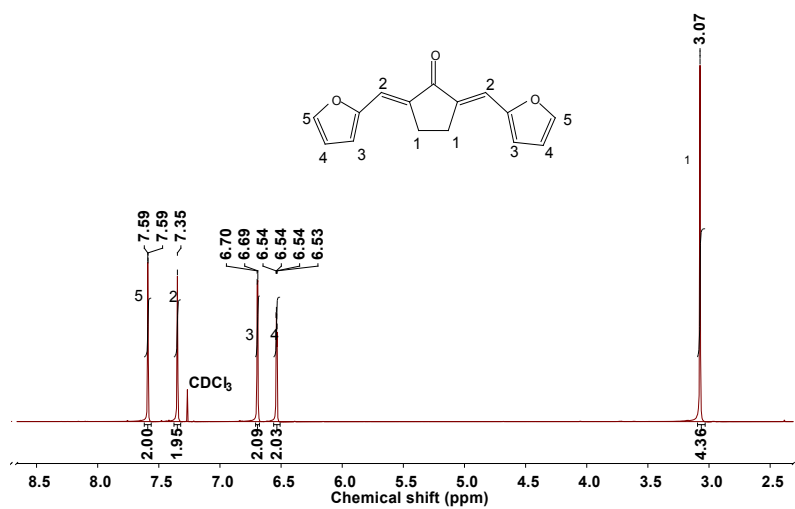

**Fig. S1.**  $^1\text{H}$  NMR spectrum of the solid product obtained over 33wt %  $\text{KF}/\gamma\text{-Al}_2\text{O}_3$ .

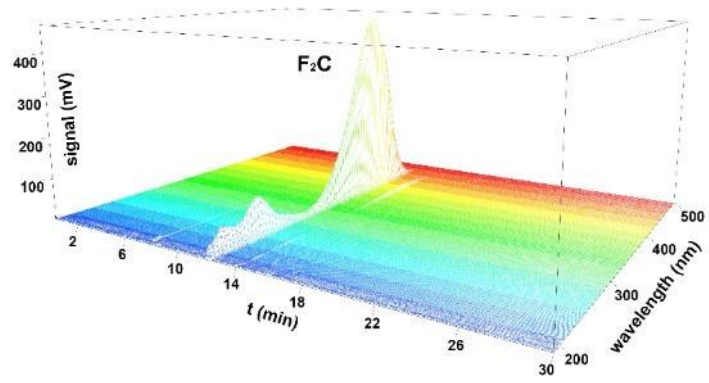

**Fig. S2.** HPLC chromatogram of the solid product obtained over 33wt % KF/ $\gamma$ -Al<sub>2</sub>O<sub>3</sub>.

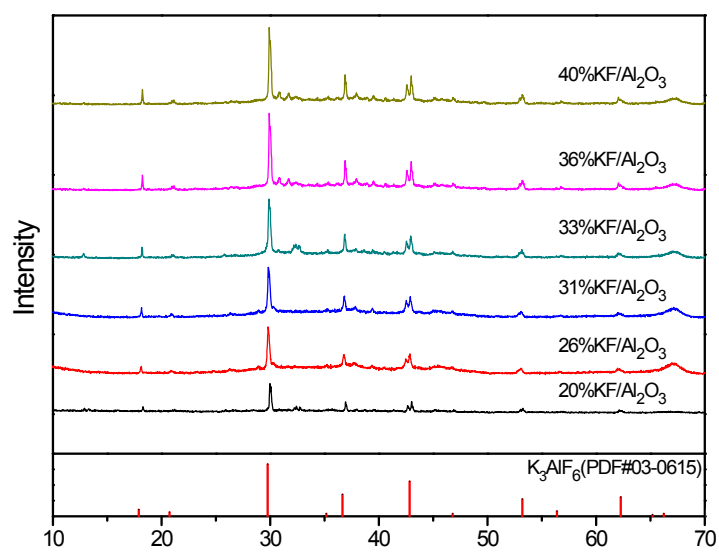

**Fig. S3.** XRD patterns of different KF loading KF/ $\gamma$ - $\text{Al}_2\text{O}_3$ .

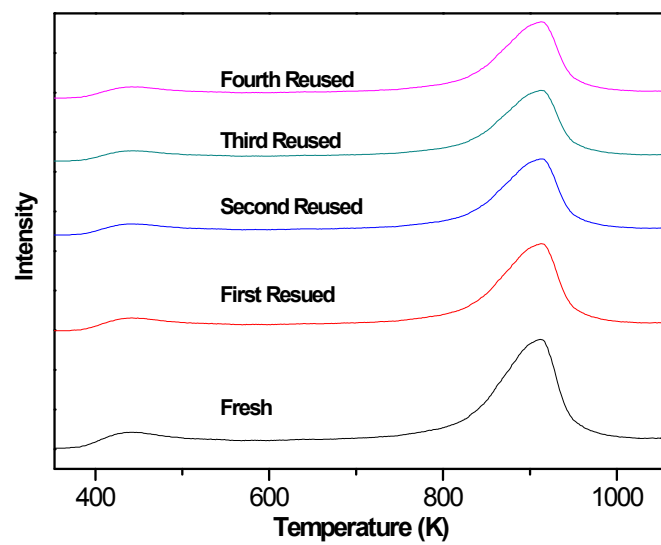

**Fig. S4.** Comparison of the CO<sub>2</sub>-TPD curves of the fresh and reused catalysts
